# Supplementary material
Source: Frontiers journal article supplement (https://www.frontiersin.org/articles/127178)
Supplement: Image_1.PDF [file Image_1.PDF]

## Supplementary material 1

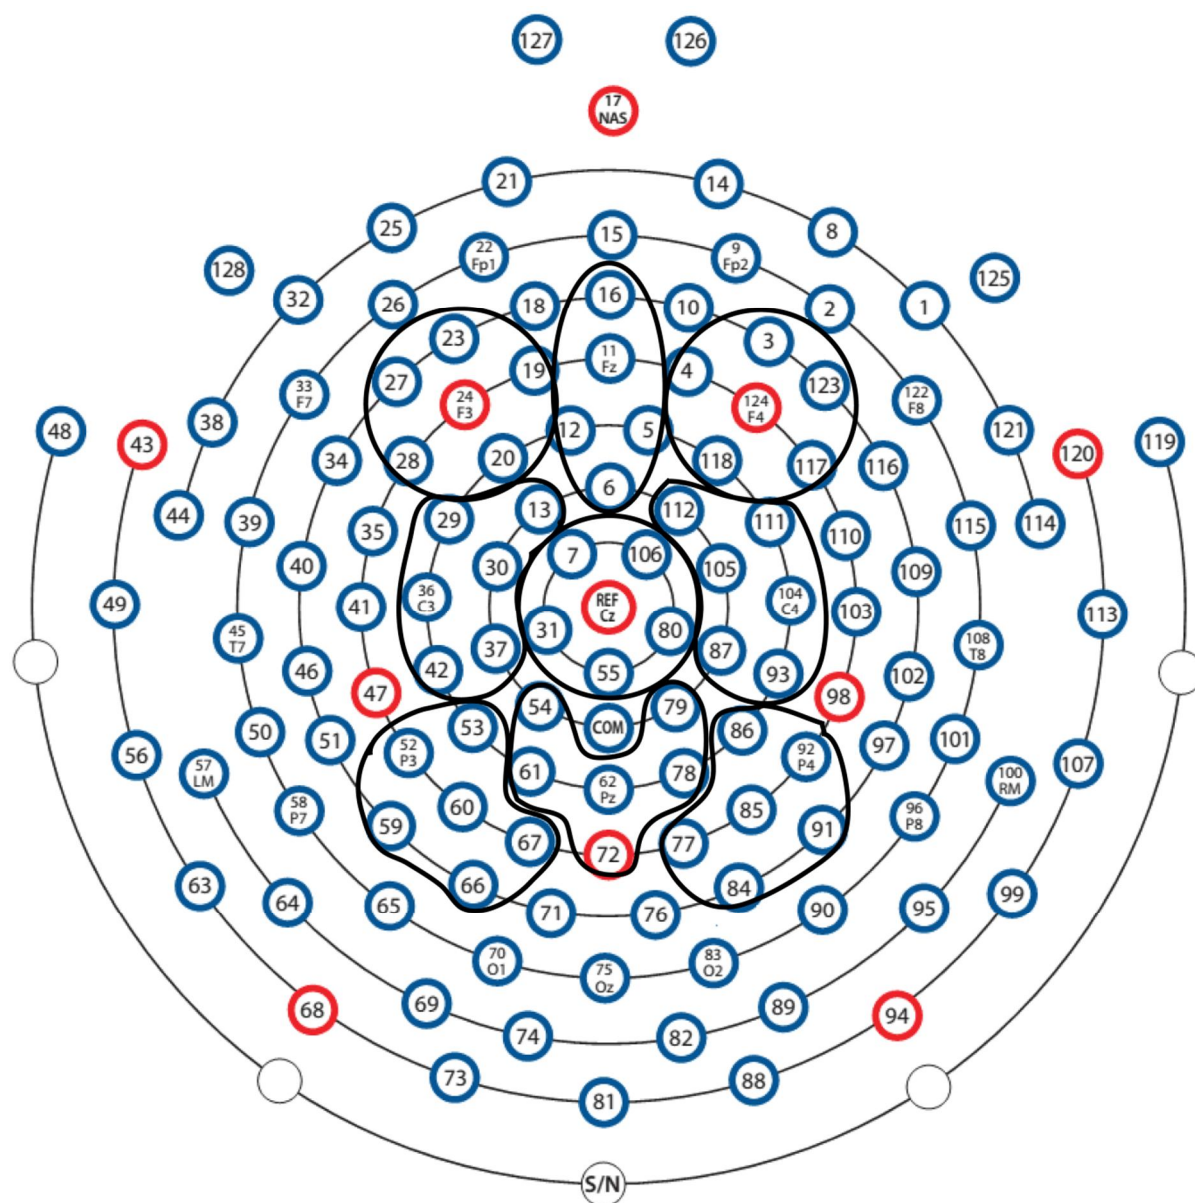

Channel layout of the Hydrocel Geodesic Sensor Net (128 channels). Channels selected for each of the 9 regions of interest have been circled.
